# Supplementary material for: Pectin and Neutral Monosaccharides Production during the Simultaneous Hydrothermal Extraction of Waste Biomass from Refining of Sugar—Optimization with the Use of Doehlert Design
Source: PubMed Central journal article supplement (PMC6385035; doi:10.3390/molecules24030472), 2019-01-29
Supplement: molecules-24-00472-s001.pdf [file molecules-24-00472-s001.pdf]

# Pectin and neutral monosaccharides production during the simultaneous hydrothermal extraction of waste biomass from refining of sugar - optimization with the use of Doehlert design

Hanna Pińkowska <sup>1</sup>, Małgorzata Krzywonos <sup>2\*</sup>, Paweł Wolak <sup>1</sup> and Adrianna Złocińska <sup>3</sup>

## Supplementary materials

**Table 1A.** Standard deviations of the coefficients of the quadratic models calculated for the pectin yield ( $Y_P$ ) (Equation 1) and for the sum of neutral monosaccharides yield ( $Y_{NS}$ ) (Equation 2).

|                     | $Y_P$ | $Y_{NS}$ |
|---------------------|-------|----------|
| Standard deviations |       |          |
| $b_0$               | 0.49  | 0.69     |
| $b_1$               | 0.49  | 0.69     |
| $b_2$               | 0.49  | 0.69     |
| $b_{11}$            | 0.78  | 1.10     |
| $b_{22}$            | 0.78  | 1.10     |
| $b_{12}$            | 0.99  | 1.39     |

## Experimental validation - pectin yield (Y)

**Table 2A.** Analysis of variance: response Y

| Source of variation | Sum of squares | Degrees of freedom | Mean square   | Ratio    | Signif   |
|---------------------|----------------|--------------------|---------------|----------|----------|
| Regression          | 3.05093E+0003  | 5                  | 6.10187E+0002 | 835.8724 | 0.102 ** |
| Residuals           | 1.44249E+0002  | 3                  | 4.80829E+0001 |          |          |
| Validity            | 1.42789E+0002  | 1                  | 1.42789E+0002 | 195.6011 | 0.330**  |
| Error               | 1.46000E+0000  | 2                  | 7.30000E-0001 |          |          |
| Total               | 3.19518E+0003  | 8                  |               |          |          |

**Table 3A.** Estimates of the coefficients : response Y

|                                    |          |
|------------------------------------|----------|
| Standard deviation of the response | 0.854    |
| R2                                 | 0.955    |
| R2A                                | 0.880    |
| R2 pred                            | N.D.     |
| PRESS                              | 5143.682 |
| Number of degrees of freedom       | 2        |

\*Corresponding author

**Table 4A.** Statistics on the coefficients : response Y

| Name | Coefficient | F. Inflation | Standard deviation | t. exp. | Signif.   |
|------|-------------|--------------|--------------------|---------|-----------|
| b0   | 118.000     |              | 0.493              | 239.21  | < 0.01*** |
| b1   | 3.393       | 1.00         | 0.493              | 6.88    | 1.70*     |
| b2   | 18.505      | 1.00         | 0.493              | 37.51   | 0.0479*** |
| b11  | -28.395     | 1.04         | 0.780              | -36.41  | 0.0503*** |
| b22  | -28.703     | 1.04         | 0.780              | -36.80  | 0.0495*** |
| b12  | -21.882     | 1.00         | 0.987              | -22.18  | 0.124**   |

**Table 5A.** Residuals: response Y

| Run | $Y_{exp.}$ | $Y_{calc.}$ | Difference | Normalized | dU    | Student-R | R-Student | D-Cook  |
|-----|------------|-------------|------------|------------|-------|-----------|-----------|---------|
| 1   | 88.120     | 92.998      | -4.878     | -5.710     | 0.833 | -13.986   | -13.986   | 163.001 |
| 2   | 91.090     | 86.212      | 4.878      | 5.710      | 0.833 | 13.986    | 13.986    | 163.001 |
| 3   | 102.500    | 97.622      | 4.878      | 5.710      | 0.833 | 13.986    | 13.986    | 163.001 |
| 4   | 57.300     | 62.178      | -4.878     | -5.710     | 0.833 | -13.986   | -13.986   | 163.001 |
| 5   | 89.400     | 84.522      | 4.878      | 5.710      | 0.833 | 13.986    | 13.986    | 163.001 |
| 6   | 108.300    | 113.178     | -4.878     | -5.710     | 0.833 | -13.986   | -13.986   | 163.001 |
| 7   | 118.900    | 118.000     | 0.900      | 1.053      | 0.333 | 1.290     | 0.130     | 0.139   |
| 8   | 117.900    | 118.000     | -0.100     | -0.117     | 0.333 | -0.143    | -0.014    | 0.002   |
| 9   | 117.200    | 118.000     | -0.800     | -0.936     | 0.333 | -1.147    | -0.116    | 0.110   |

**Table 6A.** Material balances for hydrothermal extraction of pectin from 100.0 g of SBP.

|                                               | Experiment |      |      |      |      |      |      |
|-----------------------------------------------|------------|------|------|------|------|------|------|
|                                               | 1          | 2    | 3    | 4    | 5    | 6    | 7*   |
| Material out (g):                             |            |      |      |      |      |      |      |
| WS fractions, including:                      |            |      |      |      |      |      |      |
| Pectin                                        | 31.9       | 20.2 | 45.3 | 15.9 | 25.7 | 31.0 | 26.9 |
| Uronic acids                                  | 8.8        | 9.1  | 10.3 | 5.7  | 8.9  | 10.9 | 11.8 |
| Monosaccharides                               | 0.7        | 0.3  | 0.7  | 0.3  | 0.4  | 0.8  | 0.5  |
| Carboxylic acids                              | 5.2        | 3.9  | 6.1  | 3.9  | 5.6  | 8.3  | 7.9  |
| Furfurals                                     | 2.0        | 1.2  | 2.3  | 1.1  | 1.6  | 2.8  | 2.0  |
| Protein                                       | 2.0        | 0.0  | 2.0  | 0.0  | 0.0  | 0.0  | 0.0  |
| Unidentified products in the WS fractions**   | 3.3        | 1.8  | 1.5  | 0.8  | 0.7  | 0.4  | 0.8  |
| % Recovery of products in the WS fractions*** | 9.9        | 3.9  | 22.4 | 4.1  | 8.5  | 7.8  | 3.9  |
| WI fractions (g)                              | 27.6       | 45.0 | 22.7 | 35.9 | 34.6 | 35.2 | 43.9 |
| Losses**** + gas fractions (g)                | 45.1       | 79.6 | 51.3 | 83.7 | 72.5 | 68.6 | 72.6 |
|                                               | 23.0       | 0.2  | 3.4  | 0.4  | 1.8  | 0.4  | 0.5  |

\*- mean value of 3 repeated experiments, \*\*- losses (L) calculated according to the equation  $L = \text{mass of WS fractions} - \text{mass of pectin, uronic acids, monosaccharides, carboxylic acids, furfurals and protein present in the WS fractions}$ , \*\*\*- % recovery was calculated in proportion to content of pectin in the WS fractions obtained in performed experimental series, \*\*\*\*- losses in all obtained product fractions were calculated according to equation  $L = 100 \text{ g} - \text{mass of WS fraction} - \text{mass of WI fraction}$ .

## Experimental validation - neutral monosaccharides yield (Y)

**Table 7A.** Analysis of variance: response Y

| Source of variation | Sum of squares | Degrees of freedom | Mean square   | Ratio    | Signif  |
|---------------------|----------------|--------------------|---------------|----------|---------|
| Regression          | 2.38955E+0003  | 5                  | 4.77910E+0002 | 330.6347 | 0.248** |
| Residuals           | 5.98093E+0001  | 3                  | 1.99264E+0001 |          |         |
| Validity            | 5.69184E+0001  | 1                  | 5.69194E+0001 | 39.3781  | 2.100** |
| Error               | 2.89087E+0000  | 2                  | 1.44543E+0000 |          |         |
| Total               | 2.44936E+0003  | 8                  |               |          |         |

**Table 8A.** Estimates of and statistics on the coefficients : response Y

| Standard deviation of the response | 1.202    |
|------------------------------------|----------|
| R2                                 | 0.976    |
| R2A                                | 0.935    |
| R2 pred                            | 0.161    |
| PRESS                              | 2055.567 |
| Number of degrees of freedom       | 2        |

**Table 9A.** Statistics on the coefficients : response Y

| Name | Coefficient | F. Inflation | Standard deviation | t. exp. | Signif.   |
|------|-------------|--------------|--------------------|---------|-----------|
| b0   | 78.377      |              | 0.694              | 112.91  | 0.0123*** |
| b1   | 3.720       | 1.00         | 0.694              | 5.36    | 2.98*     |
| b2   | 14.244      | 1.00         | 0.694              | 20.52   | 0.145***  |
| b11  | -32.837     | 1.04         | 1.098              | -29.92  | 0.0703*** |
| b22  | -13.944     | 1.04         | 1.098              | -12.70  | 0.0411*** |
| b12  | -22.436     | 1.00         | 1.388              | -16.16  | 0.240**   |

**Table 10A.** Residuals: response Y

| Run | $Y_{exp.}$ | $Y_{calc.}$ | Difference | Normalized | dU    | Student-R | R-Student | D-Cook |
|-----|------------|-------------|------------|------------|-------|-----------|-----------|--------|
| 1   | 52.340     | 49.260      | 3.080      | 2.562      | 0.833 | 6.275     | 6.275     | 32.815 |
| 2   | 38.740     | 41.820      | -3.080     | -2.562     | 0.833 | -6.275    | -6.275    | 32.815 |
| 3   | 61.110     | 64.190      | -3.080     | -2.562     | 0.833 | -6.275    | -6.275    | 32.815 |
| 4   | 38.880     | 35.800      | 3.080      | 2.562      | 0.833 | 6.275     | 6.275     | 32.815 |
| 5   | 55.870     | 58.950      | -3.080     | -2.562     | 0.833 | -6.275    | -6.275    | 32.815 |
| 6   | 82.980     | 79.900      | 3.080      | 2.562      | 0.833 | 6.275     | 6.275     | 32.815 |
| 7   | 78.910     | 78.377      | 0.533      | 0.444      | 0.333 | 0.543     | 0.120     | 0.025  |
| 8   | 77.000     | 78.377      | -1.377     | -1.145     | 0.333 | -1.402    | -0.316    | 0.164  |
| 9   | 79.220     | 78.377      | 0.843      | 0.701      | 0.333 | 0.859     | 0.191     | 0.062  |
